# Supplementary figures and images for: Assessment of the Red Seaweed Gelidium sesquipedale By-Products as an Organic Fertilizer and Soil Amendment
Source: MDPI journal article supplement (doi:10.3390/su142114217), 2022-10-31

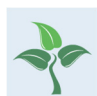**Table S1.** residue mixed with soil at 0.14g,0.24g, and 0.48g.

|       | <b>N(mg/kg)</b> | <b>P(mg/kg)</b> | <b>Ca (mg/kg)</b> |
|-------|-----------------|-----------------|-------------------|
| 0.14g | 5.55            | 0.79            | 5.53              |
| 0.24g | 9.52            | 1.32            | 9.22              |
| 0.48g | 19.05           | 2.64            | 18.45             |

Supplement: s1 [file s1]
